# Supplementary material
Source: PubMed Central journal article supplement (PMC7893217)
Supplement: rspb20202294supp1.pdf [file rspb20202294supp1.pdf]

# Supplementary Material

## **Psychoactive pollution suppresses individual differences in fish behaviour**

Giovanni Polverino, Jake M. Martin, Michael G. Bertram, Vrishin R. Soman, Hung Tan, Jack A. Brand,  
Rachel T. Mason, Bob B. M. Wong

<https://doi.org/10.1098/rspb.2020.2294>

## **Proceedings of the Royal Society B: Biological Sciences**

## Methods

### Mesocosm populations

Population surveys conducted during the study—in 2018 and 2019—determined that fish densities were comparable across the exposure treatments (mean  $\pm$  s.e.:  $79 \pm 14$ ,  $97 \pm 17$ , and  $74 \pm 14$ , for unexposed, low fluoxetine, and high fluoxetine, respectively;  $df_{2,23}$ , ANOVA:  $p = 0.562$ ).

### Fluoxetine dosing and analytical verification of treatment levels

Nominal fluoxetine concentrations in mesocosm tanks were maintained via static renewal. For both fluoxetine treatments (low and high), mesocosm tanks were dosed twice weekly (as described in detail in [1,2]). Briefly, this involved preparing two separate stock solutions with either 2 mg or 20 mg of fluoxetine hydrochloride (Sigma Aldrich; product number: F132, CAS: 56296-78-7) dissolved in 100 mL of methanol, for the low and high treatments, respectively. Stock solutions were diluted to produce dosing solutions: 1 mL aliquot of stock solution (low or high) was diluted with 1000 mL of reverse osmosis water. Further, to control for any potential solvent effects, as well as to maintain consistent levels of handling across all mesocosm tanks, a solvent solution (1 mL of methanol in 1000 mL of reverse osmosis water) was also added to all unexposed tanks twice per week. Therefore, all 12 mesocosm tanks received 2 mL of methanol weekly (0.0006% methanol by mesocosm water volume).

To verify concentrations of fluoxetine and norfluoxetine—fluoxetine's primary metabolite—over the two-year exposure period, water samples (40 mL) were drawn once per month from all mesocosm tanks in the low and high treatments. To ensure the absence of fluoxetine contamination in control tanks (unexposed treatment), water samples were also collected from these mesocosms every two months throughout the study. Water samples were stored at 4 °C in the dark and analysed with gas chromatography–tandem mass spectrometry (7000C Triple Quadrupole GC-MS/MS, Agilent Technologies, Delaware, USA; lower quantification limit: 2 ng l<sup>-1</sup>). Water analysis was performed by Envirolab Services (MPL Laboratories; NATA accreditation: 2901; accredited for compliance with

ISO/IEC: 17025), within four days of collection. A detailed description of the water analysis protocol is provided in [3].

### **Chemical analyses**

Mesocosm tanks from the same exposure treatment did not differ significantly in fluoxetine concentration throughout the study (mean  $\pm$  s.e.:  $40 \pm 3 \text{ ng l}^{-1}$  and  $366 \pm 28 \text{ ng l}^{-1}$ ; ANOVA:  $p = 0.415$ ,  $df_{3,89}$  and  $p = 0.817$ ,  $df_{3,89}$  for low and high fluoxetine, respectively). Nevertheless, we have accounted for the small variation in fluoxetine levels in our analyses, confirming that differences across mesocosm tanks had no effect on fish behavioural and size variation (Tables S3 and S4). Small variation in fluoxetine concentrations are likely the result of the scale and ecological realism of the mesocosm system, with numerous adult fish exposed in large tanks with gravel substrate and natural vegetation, to which fluoxetine can readily sorb [4,5]. Water analysis of control (unexposed) mesocosm tanks indicated no fluoxetine contamination.

1 **Figure S1: Snapshots of the open-field arenas with examples of activity level and refuge use in one individual from each of the (a) unexposed, (b) low-**  
2 **fluoxetine, and (c) high-fluoxetine treatments, respectively, over the four trials.** In a trial, a fish was allowed to freely explore the arena for 20 minutes,  
3 where we measured its activity level (distance moved in cm) and risk-taking (use of the refuge in seconds, and consequently not exploring open spaces that  
4 are unfamiliar and potentially dangerous): the arena was white, while the refuge—top-right corner—was black. Shown are the tracking outputs produced  
5 by EthoVision for each of the four trials, and heat maps generated by MATLAB: red indicates high and blue indicates low traffic.

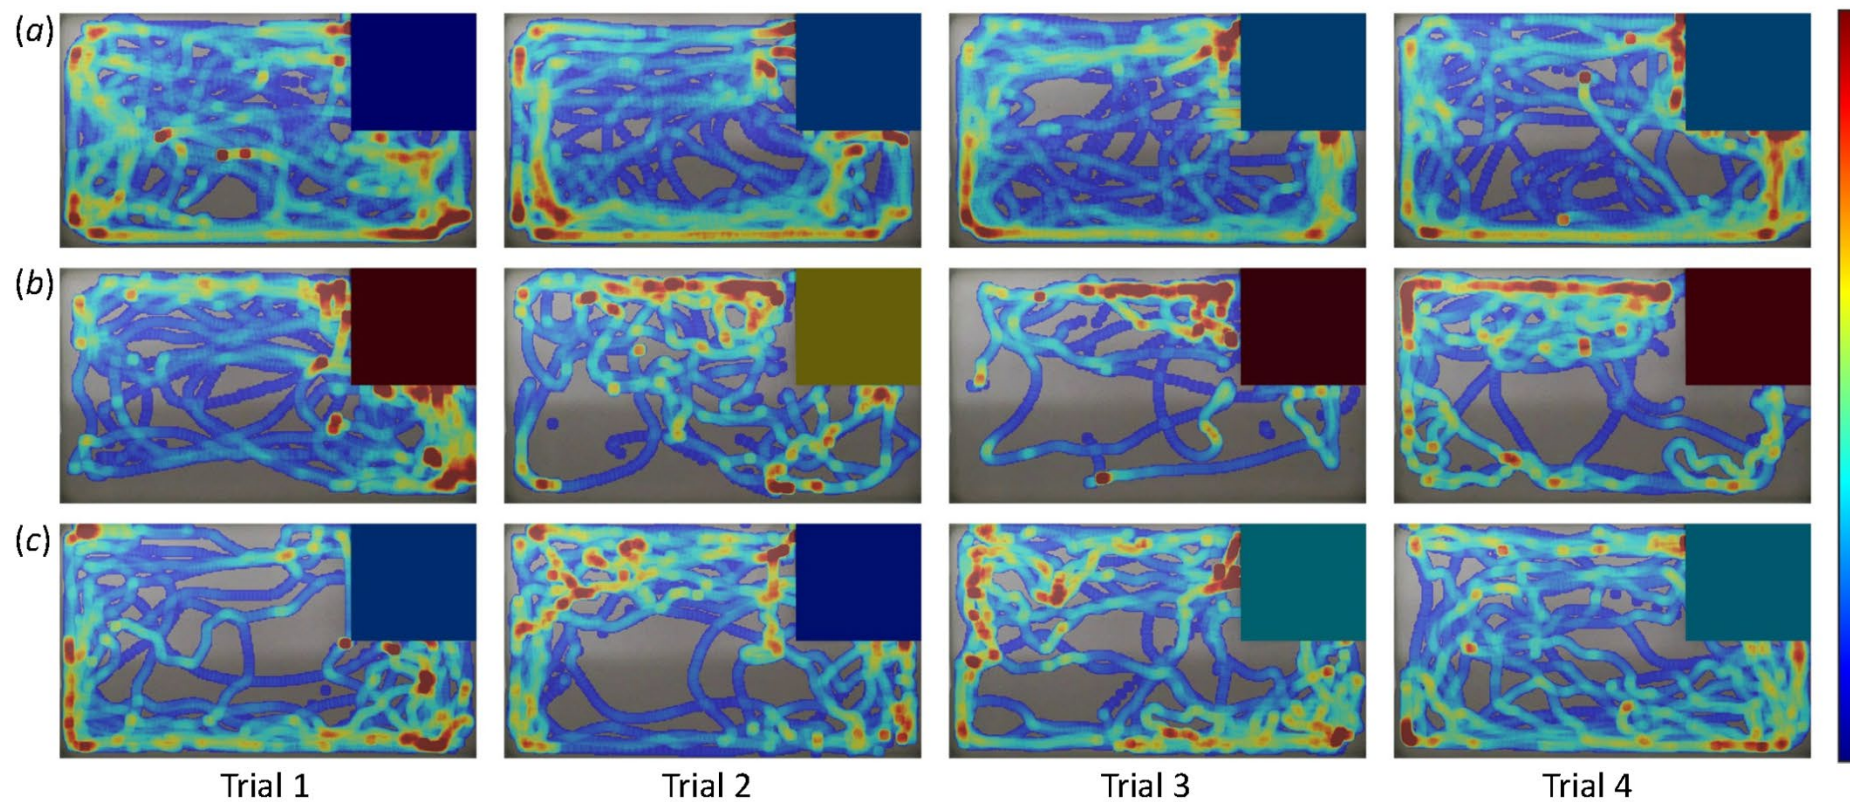

7 **Results**

8 **Table S1: Comparison of LMMs with different random (co)variance structures for activity (distance**

9 **moved) and risk-taking (refuge use).** We compared two models with both random intercepts (ID)

10 and slopes (treatment, class, or trial) across individuals against a reduced model with only random

11 intercepts. We also compared the model with random intercepts with a model in which random

12 intercepts were excluded. Significant improvements in the model fit are tested with both Akaike

13 information criteria ( $\Delta AIC$ ) and likelihood-ratio tests ( $p$ ). Treatment (unexposed, low fluoxetine, high

14 fluoxetine), class (juveniles, males, females), mesocosm population (four per treatment), trial (four

15 repeated measures per individual), and time of day are included as fixed effects in all models.

16 Significance was set at  $\alpha < 0.05$  and significant results are in bold; the model with random intercepts

17 and treatment as the random slope was best supported as the most parsimonious model for activity,

18 while only random intercepts but not random slopes explained a significant portion of the variance

19 in risk-taking. The random structure is written in the syntax of the *lme4* R package.

| Model                    | $\chi^2_1$ | $\Delta AIC$ | $p$               |
|--------------------------|------------|--------------|-------------------|
| Activity: distance moved |            |              |                   |
| (1 ID)                   | 118.040    | 116.04       | <b>&lt; 0.001</b> |
| (treatment ID)           | 5.998      | 2.000        | <b>0.049</b>      |
| (class ID)               | 4.814      | < 0.001      | 0.090             |
| (trial ID)               | 1.424      | 2.600        | 0.491             |
| Risk-taking: refuge use  |            |              |                   |
| (1 ID)                   | 45.081     | 43.081       | <b>&lt; 0.001</b> |
| (treatment ID)           | 1.080      | 2.900        | 0.583             |
| (class ID)               | 0.323      | 3.700        | 0.851             |
| (trial ID)               | 3.353      | 0.700        | 0.187             |

20

21 **Table S2: Changes in variance components between and within individuals, and in the overall**  
 22 **measure of repeatability for activity (distance moved) and risk-taking (refuge use) across**  
 23 **treatments (unexposed, low fluoxetine, high fluoxetine) with a categorical variable as a predictor.**  
 24 Medians ( $\pm$  s.e.) are indicated for the intercepts and slopes of the regression lines. Significance was  
 25 set at  $\alpha < 0.05$  and significant results are in bold. Because of the nature of the risk-taking variable,  
 26 high values represent low risk-taking.

| Model                    | Intercept $\pm$ s.e.    | Slope $\pm$ s.e.         | <i>p</i>     |
|--------------------------|-------------------------|--------------------------|--------------|
| Activity: distance moved |                         |                          |              |
| $V_{\text{between}}$     | 343 403.9 $\pm$ 880.327 | -198 779 $\pm$ 1 050.181 | <b>0.033</b> |
| $V_{\text{within}}$      | 287 853.6 $\pm$ 316.534 | 64 955.07 $\pm$ 524.901  | 0.204        |
| Repeatability            | 0.502 $\pm$ 0.001       | -0.242 $\pm$ 0.001       | <b>0.021</b> |
| Risk-taking: refuge use  |                         |                          |              |
| $V_{\text{between}}$     | 3.937 $\pm$ 0.023       | 3.096 $\pm$ 0.038        | 0.381        |
| $V_{\text{within}}$      | 22.405 $\pm$ 0.026      | 1.714 $\pm$ 0.038        | 0.643        |
| Repeatability            | 0.139 $\pm$ 0.001       | 0.068 $\pm$ 0.001        | 0.503        |

27

28 **Table S3: Pairwise comparisons between variance components (within and between individuals)**  
 29 **and repeatability estimates for activity (distance moved) and risk-taking (refuge use) across**  
 30 **treatments (unexposed, low fluoxetine, high fluoxetine).** Mean estimates and their 95% credible  
 31 intervals are represented, and significant results (bold) correspond to estimated differences whose  
 32 credible intervals do not overlap with zero.

| Models                   | Pairwise comparisons | Estimate           | 95% CIs                        |
|--------------------------|----------------------|--------------------|--------------------------------|
| Activity: distance moved |                      |                    |                                |
| $V_{\text{between}}$     | Unexposed-Low        | <b>172 168.100</b> | <b>12 196.090, 429 603.500</b> |
|                          | Unexposed-High       | <b>233 493.500</b> | <b>38 073.480, 432 233.400</b> |
|                          | Low-High             | -537.279           | -130 613.300, 164 493          |
| $V_{\text{within}}$      | Unexposed-Low        | -61 931.780        | -166 754.400, 39 138.950       |
|                          | Unexposed-High       | -59 393.510        | -167 617.200, 32 214.990       |
|                          | Low-High             | 10 665.240         | -109 928.300, 112 270          |
| Repeatability            | Unexposed-Low        | <b>0.256</b>       | <b>0.038, 0.442</b>            |
|                          | Unexposed-High       | <b>0.279</b>       | <b>0.068, 0.447</b>            |
|                          | Low-High             | 0.009              | -0.170, 0.232                  |
| Risk-taking: refuge use  |                      |                    |                                |
| $V_{\text{between}}$     | Unexposed-Low        | -2.681             | -10.650, 4.539                 |
|                          | Unexposed-High       | -5.280             | -12.814, 2.638                 |
|                          | Low-High             | -0.181             | -10.425, 6.890                 |
| $V_{\text{within}}$      | Unexposed-Low        | -1.756             | -9.229, 5.535                  |
|                          | Unexposed-High       | 2.278              | -4.803, 8.573                  |
|                          | Low-High             | 3.554              | -3.109, 10.870                 |
| Repeatability            | Unexposed-Low        | -0.059             | -0.266, 0.132                  |
|                          | Unexposed-High       | -0.188             | -0.339, 0.064                  |
|                          | Low-High             | -0.070             | -0.285, 0.124                  |

33

34 **Table S4: Correlation estimates (phenotypic, and between and within individuals) for activity**  
 35 **(distance moved) and risk-taking (refuge use) across treatments (unexposed, low fluoxetine, high**  
 36 **fluoxetine).** The best estimate of correlation coefficients and their 95% credible intervals are  
 37 represented for each treatment. Significant results (bold) correspond to correlation coefficients  
 38 whose confidence intervals do not overlap with zero. Because of the nature of the risk-taking  
 39 variable, high values represent low risk-taking.

| Correlations       | Unexposed                 | Low fluoxetine                           | High fluoxetine            |
|--------------------|---------------------------|------------------------------------------|----------------------------|
| Phenotypic         | -0.027<br>(-0.163, 0.117) | -0.106<br>(-0.240, 0.039)                | -0.0168<br>(-0.163, 0.131) |
| Between individual | -0.029<br>(-0.999, 0.891) | <b>-0.482</b><br><b>(-0.999, -0.076)</b> | -0.171<br>(-0.695, 0.335)  |
| Within individual  | -0.032<br>(-0.187, 0.116) | 0.024<br>(-0.139, 0.172)                 | 0.038<br>(-0.116, 0.186)   |

40



41 **Figure S2: Pairwise differences in activity (a; distance moved), risk-taking (b; refuge use), and (c)**  
42 **body size of fish across treatments (unexposed, low fluoxetine, high fluoxetine).** Estimated  
43 marginal means (EMMs + SE) account for the contribution of the other fixed and random effects  
44 included in each model: class (juveniles, males, females), mesocosm population (four per  
45 treatment), trial (four repeated measures per individual), time of day, and random intercepts  
46 (individual ID) for activity and risk-taking; and class and random intercepts (mesocosm population  
47 ID) for body size. We ran pairwise comparisons with the conservative Bonferroni method.  
48 Significance was set at  $\alpha < 0.05$ , and means not sharing a common superscript are significantly  
49 different. Because of the nature of the risk-taking variable, high values represent low risk-taking.

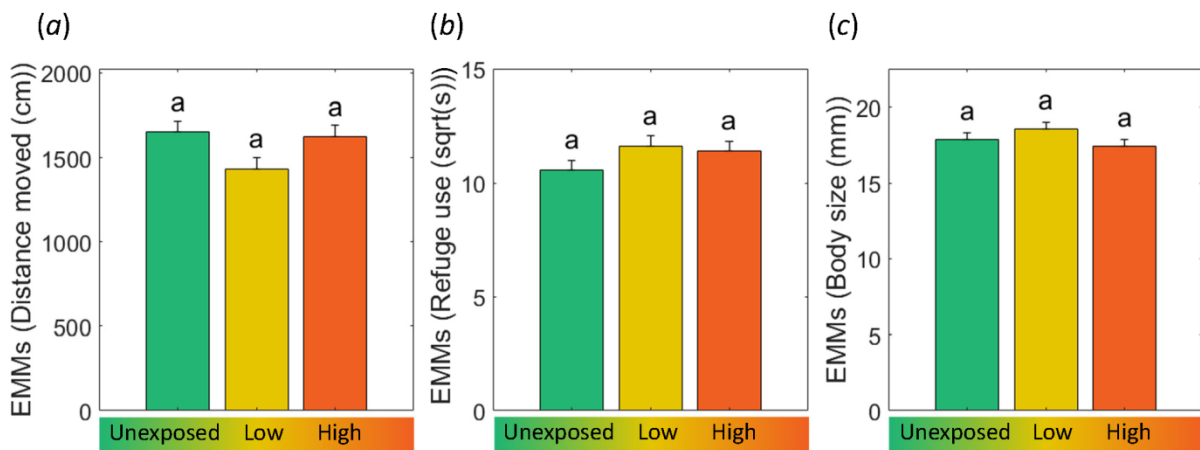

50  
51

52 **Table S5: Results from the fixed factor structure of LMMs with activity (distance moved) and risk-**  
53 **taking (refuge use) for each treatment as dependent variables.** Class (juveniles, males, females),  
54 mesocosm population (four per treatment), trial (four repeated measures per individual), and time  
55 of day are included in all models as fixed effects. Random intercepts are included for each individual,  
56 which allowed variance partitioning. Analysis of variance was performed with Satterthwaite's  
57 method. Significance was set at  $\alpha < 0.05$  and significant results are in bold. Because of the nature of  
58 the risk-taking variable, high values represent low risk-taking.

| Model                    | Fixed effects | Mean sq.  | Num <sub>df</sub> , Den <sub>df</sub> | F     | p                 |
|--------------------------|---------------|-----------|---------------------------------------|-------|-------------------|
| Activity: distance moved |               |           |                                       |       |                   |
| Unexposed                | Class         | 50 218    | 2, 60                                 | 0.178 | 0.837             |
|                          | Mesocosm      | 501 628   | 2, 60                                 | 1.781 | 0.177             |
|                          | Trial         | 1 615 281 | 3, 178                                | 5.734 | <b>&lt; 0.001</b> |
|                          | Time of day   | 107 661   | 4, 60                                 | 0.382 | 0.820             |
| Low fluoxetine           | Class         | 1 273 415 | 2, 53                                 | 3.701 | <b>0.031</b>      |
|                          | Mesocosm      | 452 969   | 2, 53                                 | 1.316 | 0.277             |
|                          | Trial         | 1 205 325 | 3, 166                                | 3.503 | <b>0.017</b>      |
|                          | Time of day   | 183 465   | 4, 53                                 | 0.533 | 0.712             |
| High fluoxetine          | Class         | 1 194 583 | 2, 58                                 | 3.456 | <b>0.038</b>      |
|                          | Mesocosm      | 919 365   | 2, 58                                 | 2.659 | 0.078             |
|                          | Trial         | 1 448 457 | 3, 174                                | 4.190 | <b>0.007</b>      |
|                          | Time of day   | 633 969   | 4, 58                                 | 1.834 | 0.135             |
| Risk-taking: refuge use  |               |           |                                       |       |                   |
| Unexposed                | Class         | 23.768    | 2, 58                                 | 1.102 | 0.339             |
|                          | Mesocosm      | 60.610    | 2, 58                                 | 2.811 | 0.068             |
|                          | Trial         | 80.213    | 3, 176                                | 3.720 | <b>0.013</b>      |
|                          | Time of day   | 5.072     | 4, 58                                 | 0.235 | 0.917             |
| Low fluoxetine           | Class         | 45.796    | 2, 59                                 | 1.954 | 0.151             |
|                          | Mesocosm      | 25.005    | 2, 58                                 | 1.067 | 0.351             |
|                          | Trial         | 15.686    | 3, 173                                | 0.670 | 0.572             |
|                          | Time of day   | 49.527    | 4, 59                                 | 2.114 | 0.090             |
| High fluoxetine          | Class         | 14.180    | 2, 57                                 | 0.715 | 0.494             |
|                          | Mesocosm      | 8.048     | 2, 58                                 | 0.406 | 0.668             |
|                          | Trial         | 46.706    | 3, 174                                | 2.354 | 0.074             |
|                          | Time of day   | 7.063     | 4, 58                                 | 0.356 | 0.839             |

60 **Table S6: Results from the LMM with body size as the dependent variable.** Treatment (unexposed,  
61 low fluoxetine, high fluoxetine), class (juveniles, males, females), and their interaction are included  
62 as fixed effects. Random intercepts are also included for each mesocosm, which allowed accounting  
63 for repeated measures and variance partitioning: intercepts ( $V_{\text{between}}$ ), residuals ( $V_{\text{within}}$ ), and  
64 repeatability. Test statistics ( $\chi_1^2$ ) and significance levels of the random effects (intercepts) were  
65 estimated using LRTs ( $p$ ) and Akaike information criteria ( $\Delta\text{AIC}$ ) between the LM and LMM. Analysis  
66 of variance was performed with Satterthwaite's method. Significance was set at  $\alpha < 0.05$  and  
67 significant results are in bold; body size increased on average from juveniles to adult females as is  
68 typical in this species (estimate  $\pm$  s.e.:  $9.619 \pm 0.499$ ,  $5.110 \pm 0.496$ , and  $4.510 \pm 0.499$ ;  $df_{171}$ ;  $p <$   
69  $0.001$ ,  $p < 0.001$ , and  $p < 0.001$ ; for females–juveniles, females–males, and males–juveniles,  
70 respectively), irrespective of treatment and mesocosm population.

| Body size                |          |            |                    |                   |
|--------------------------|----------|------------|--------------------|-------------------|
| Fixed effects            | Mean sq. | $df$       | $F$                | $p$               |
| Treatment                | 12.150   | 2, 9       | 1.646              | 0.246             |
| Class                    | 1376.310 | 2, 171     | 186.416            | <b>&lt; 0.001</b> |
| Treatment $\times$ class | 3.570    | 4, 171     | 0.483              | 0.748             |
| Random effects           | Estimate | $\chi_1^2$ | $\Delta\text{AIC}$ | $p$               |
| $V_{\text{between}}$     | 0.236    | 2.856      | 0.856              | 0.091             |
| $V_{\text{within}}$      | 7.383    | -          | -                  | -                 |
| Repeatability            | 0.031    | -          | -                  | -                 |

71 **References**

- 72 [1] Tan, H., Polverino, G., Martin, J.M., Bertram, M.G., Wiles, S.C., Palacios, M.M., Bywater, C.L.,  
73 White, C.R. & Wong, B.B.M. 2020 Chronic exposure to a pervasive pharmaceutical pollutant erodes  
74 among-individual phenotypic variation in a fish. *Environ. Pollut.* **263**, 114450.
- 75 [2] Wiles, S.C., Bertram, M.G., Martin, J.M., Tan, H., Lehtonen, T.K. & Wong, B.B.M. 2020 Long-term  
76 pharmaceutical contamination and temperature stress disrupt fish behaviour. *Environ. Sci. Technol.*  
77 **54**, 8072–82.
- 78 [3] Bertram, M.G., Ecker, T.E., Wong, B.B., O'Bryan, M.K., Baumgartner, J.B., Martin, J.M. & Saaristo,  
79 M. 2018 The antidepressant fluoxetine alters mechanisms of pre- and post-copulatory sexual  
80 selection in the eastern mosquitofish (*Gambusia holbrooki*). *Environ. Pollut.* **238**, 238–247.
- 81 [4] Kwon, J.W. & Armbrust, K.L. 2006 Laboratory persistence and fate of fluoxetine in aquatic  
82 environments. *Environ. Toxicol. Chem.* **25**, 2561-2568.
- 83 [5] Sánchez-Argüello, P., Fernández, C. & Tarazona, J.V. 2009 Assessing the effects of fluoxetine on  
84 *Physa acuta* (Gastropoda, Pulmonata) and *Chironomus riparius* (Insecta, Diptera) using a two-species  
85 water-sediment test. *Sci. Total. Environ.* **407**, 1937–1946 (2009).
